# Supplementary material
Source: publisher site journal article supplement (https://www.dovepress.com/article/353019)
Supplement: Supplementary file 1 [file get_supplementary_file.php]

**Supplementary Table S1. The results of pathway analysis for potential biomarkers of PE**

| **Pathway Name** | **Raw p** | **Holm adjust** | **FDR** | **Impact** |
| --- | --- | --- | --- | --- |
| Aminoacyl-tRNA biosynthesis | 2.79E-08 | 2.35E-06 | 2.35E-06 | 0.16667 |
| Arginine biosynthesis | 1.43E-05 | 0.001183 | 0.00059864 | 0.2538 |
| Alanine, aspartate and glutamate metabolism | 3.17E-05 | 0.0025992 | 0.00088752 | 0.67148 |
| Butanoate metabolism | 0.0020454 | 0.16568 | 0.042953 | 0.14286 |
| Arginine and proline metabolism | 0.0028433 | 0.22747 | 0.047768 | 0.5004 |
| Glycine, serine and threonine metabolism | 0.0035524 | 0.28064 | 0.049733 | 0.58578 |
| Valine, leucine and isoleucine biosynthesis | 0.004773 | 0.37229 | 0.057276 | 0 |
| Citrate cycle (TCA cycle) | 0.010394 | 0.80035 | 0.097449 | 0.25782 |
| Glyoxylate and dicarboxylate metabolism | 0.010441 | 0.80035 | 0.097449 | 0.1799 |
| Phenylalanine metabolism | 0.012211 | 0.91583 | 0.10257 | 0.59524 |
| D-Glutamine and D-glutamate metabolism | 0.015359 | 1 | 0.11215 | 0.5 |
| Histidine metabolism | 0.016022 | 1 | 0.11215 | 0.34426 |
| Sphingolipid metabolism | 0.049732 | 1 | 0.29084 | 0.2069 |

**Abbreviations:** FDR, false discovery rate.
